# Supplementary material for: Methylxanthines for halogen bonded cocrystals with 1,4-diiodotetrafluorobenzene: green synthesis, structure, photophysics and DFT studies
Source: Royal Society of Chemistry journal article supplement (doi:10.1039/d4ce00138a), 2024-01-01

## Supplementary Information

### Methylxanthines for Halogen Bonded Cocrystals with 1,4-Diiodotetrafluorobenzene: Green Synthesis, Structure, Photophysics and DFT Studies

Mónica Benito,<sup>1\*</sup> Rosario Núñez,<sup>1\*</sup> Sohini Sinha,<sup>1</sup> Claudio Roscini,<sup>2</sup> Yoan Hidalgo-Rosa,<sup>3,4</sup>  
Eduardo Schott,<sup>3</sup> Ximena Zarate,<sup>5\*</sup> Elies Molins<sup>1</sup>

<sup>1</sup>Institut de Ciència de Materials de Barcelona (ICMAB-CSIC), Campus UAB, 08193 Bellaterra, Spain

<sup>2</sup>Catalan Institute of Nanoscience and Nanotechnology (ICN2), CSIC and The Barcelona Institute of Science and Technology (BIST), Campus UAB, Bellaterra, Barcelona 08193, Spain

<sup>3</sup>Departamento de Química Inorgánica, Facultad de Química y Farmacia, Centro de Energía UC, Centro de Investigación en Nanotecnología y Materiales Avanzados CIEN-UC, Pontificia Universidad Católica de Chile, Avenida Vicuña Mackenna, 4860 Santiago, Chile

<sup>4</sup>Facultad de Ingeniería, Universidad Finis Terrae, Av. Pedro de Valdivia 1509, Providencia, Santiago, Chile

<sup>5</sup>Instituto de Ciencias Aplicadas, Facultad de Ingeniería, Universidad Autónoma de Chile, Av. Pedro de Valdivia 425, Santiago, Chile

#### TABLE OF CONTENTS

| Figure/Table      |                                                                                                                                                                                                                                |
|-------------------|--------------------------------------------------------------------------------------------------------------------------------------------------------------------------------------------------------------------------------|
| <b>Figure S1</b>  | Structural models used in the simulations: a) cocrystals and b) Free xanthines.                                                                                                                                                |
| <b>Table S1</b>   | Hydrogen-bond geometry (Å, °) for compounds <b>CAF-DITFB</b> , <b>TPH-DITFB</b> and <b>TBR-DITFB (2:1)</b> .                                                                                                                   |
| <b>Figure S2</b>  | TGA-DSC of the cocrystal <b>CAF-DITFB</b> .                                                                                                                                                                                    |
| <b>Figure S3</b>  | a) TGA-DSC trace of cocrystal <b>TPH-DITFB</b> and b) phase transformation between theophylline and cocrystal <b>TPH-DITFB</b> .                                                                                               |
| <b>Figures S4</b> | Transformation process by heating <b>CAF-DITFB</b> cocrystal (left) to <b>CAF</b> (right). Optical images under visible light (a and b) and under UV (365 nm) (c and d). Under UV the off-on transformation could be observed. |
| <b>Figures S5</b> | FTIR spectra of natural xanthines, coformer <b>DITFB</b> and their cocrystals.                                                                                                                                                 |
| <b>Table S2</b>   | Summary of characteristic vibrational modes of the studied xanthines and coformer <b>DITFB</b> .                                                                                                                               |
| <b>Figures S6</b> | Absorption and fluorescent emission spectra of <b>TPH</b> and <b>TPH-DITFB</b> cocrystal (a and b).                                                                                                                            |
| <b>Table S3</b>   | Comparison of experimental and theoretical calculated cell parameters.                                                                                                                                                         |
| <b>Table S4</b>   | X-bond interaction with distances and angles for the optimized cocrystals through periodic DFT calculations                                                                                                                    |

|                   |                                                                                                                                                                                                                                                                                                                                             |
|-------------------|---------------------------------------------------------------------------------------------------------------------------------------------------------------------------------------------------------------------------------------------------------------------------------------------------------------------------------------------|
| <b>Table S5</b>   | Surfaces of the molecular orbital (MOs) with their energies (eV), PBE0/def2-TZPP theoretical level.                                                                                                                                                                                                                                         |
| <b>Figure S7</b>  | Energy diagrams for the most probable emission pathways in free xanthenes. ISC, intersystem crossing.                                                                                                                                                                                                                                       |
| <b>Figure S8</b>  | Frontier molecular orbitals of <b>CAF</b> based on the configurations of first electronic excited state. a. FMO of <b>CAF</b> in the $S_1$ electronic state. b. FMO of <b>CAF</b> in the $T_1$ electronic state. MO involved in these emissive states of the $T_1$ electronic state are dotted by green lines.                              |
| <b>Figure S9</b>  | Frontier molecular orbitals of theobromine ( <b>TBR</b> ) based on the configurations of first electronic excited state. a. FMO of <b>TBR</b> in the $S_1$ electronic state. b. FMO of <b>TBR</b> in the $T_1$ electronic state. MO involved in these emissive states of the $T_1$ electronic state are dotted by green lines.              |
| <b>Figure S10</b> | Frontier molecular orbitals of theophylline ( <b>TPH</b> ) based on the configurations of first electronic excited state. a. FMO of <b>TPH</b> in the $S_1$ electronic state. b. FMO of <b>TPH</b> in the $T_1$ electronic state. MO involved in these emissive states of the $T_1$ electronic state are dotted by green lines.             |
| <b>Figure S11</b> | Frontier molecular orbitals of cocrystals based on the configurations of ground electronic excited state. a. FMO of <b>CAF-DITFB</b> in the $S_0$ electronic state. b. FMO of <b>TPH-DITFB</b> in the $S_0$ electronic state. c. FMO of <b>TBR-DITFB</b> in the $S_0$ electronic state.                                                     |
| <b>Figure S12</b> | Energy diagrams for the most probable emission pathways in cocrystals. ISC, intersystem crossing.                                                                                                                                                                                                                                           |
| <b>Figure S13</b> | Frontier molecular orbitals of cocrystals <b>CAF-DITFB</b> based on the configurations of first electronic excited state. a. FMO of <b>CAF-DITFB</b> in the $S_1$ electronic state. b. FMO of <b>CAF-DITFB</b> in the $T_1$ electronic state. MO involved in these emissive states of the $T_1$ electronic state are dotted by green lines. |
| <b>Figure S14</b> | Frontier molecular orbitals of cocrystals <b>TBR-DITFB</b> based on the configurations of first electronic excited state. a. FMO of <b>TBR-DITFB</b> in the $S_1$ electronic state. b. FMO of <b>TBR-DITFB</b> in the $T_1$ electronic state. MO involved in these emissive states of the $T_1$ electronic state are dotted by green lines. |
| <b>Figure S15</b> | Frontier molecular orbitals of cocrystals <b>TPH-DITFB</b> based on the configurations of first electronic excited state. a. FMO of <b>TPH-DITFB</b> in the $S_1$ electronic state. b. FMO of <b>TPH-DITFB</b> in the $T_1$ electronic state. MO involved in these emissive states of the $T_1$ electronic state are dotted by green lines. |

**Figure S1.** Structural models used in the simulations: a) cocrystals and b) Free xanthenes.

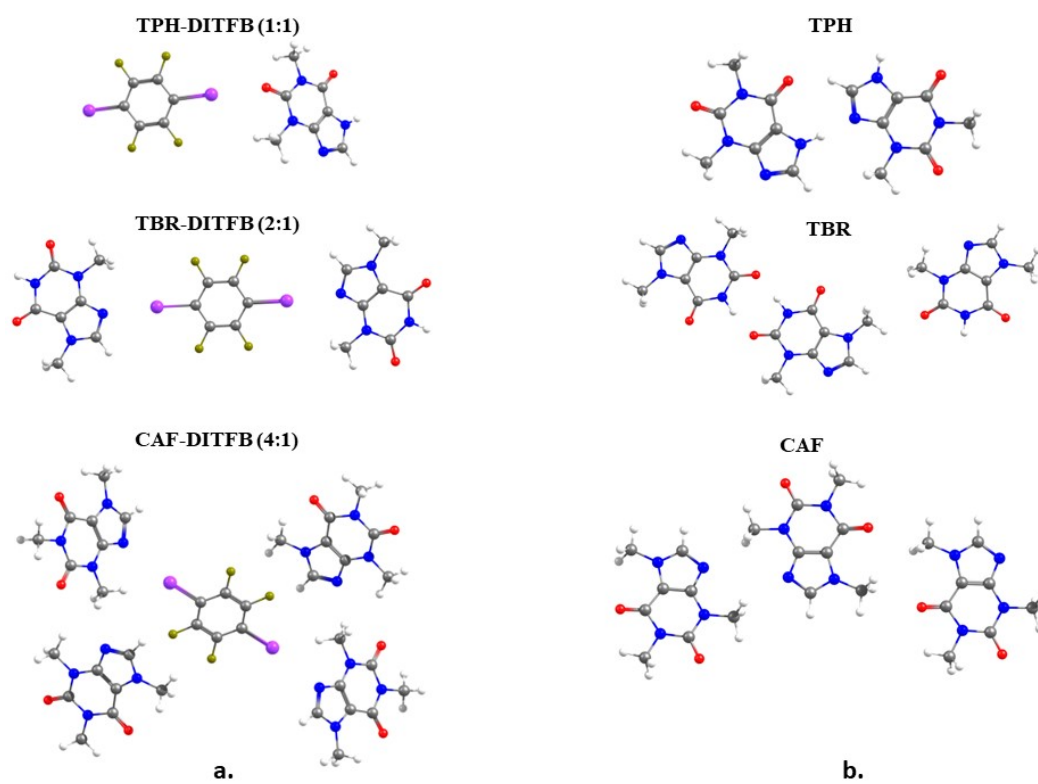

**Table S1.** Hydrogen-bond geometry (Å, °) for compounds **CAF-DITFB**, **TPH-DITFB** and **TBR-DITFB (2:1)**.

| <i>Compound</i>        | <i>D—H···A</i>                   | <i>D—H</i> | <i>H···A</i> | <i>D···A</i> | <i>D—H···A</i> |
|------------------------|----------------------------------|------------|--------------|--------------|----------------|
| <b>CAF-DITFB</b>       | C(14)-H(14C)···O(13)             | 0.96       | 2.48         | 3.097(13)    | 121.9          |
|                        | C(28)-H(28)···O(11)#2            | 0.93       | 2.45         | 3.284(10)    | 149.6          |
|                        | C(30)-H(30A)···O(31)#3           | 0.96       | 2.53         | 3.449(10)    | 161.4.0        |
|                        | C(30)-H(30C)···O(31)#4           | 0.96       | 2.60         | 3.217(10)    | 122.2          |
|                        | C(32)-H(32A)···I(1)              | 0.96       | 3.15         | 3.954(9)     | 141.9          |
|                        | C(34)-H(34A)···O(11)#2           | 0.96       | 2.57         | 3.456(11)    | 153.1          |
| <b>TPH-DITFB</b>       | N(7)-H(7)···O(6) <sup>i</sup>    | 0.86       | 1.93         | 2.778 (4)    | 167.3          |
|                        | C(1)-H(1A)···O(2) <sup>ii</sup>  | 0.96       | 2.53         | 3.425 (5)    | 155.9          |
|                        | C(1)-H(1B)···O(2) <sup>iii</sup> | 0.96       | 2.63         | 3.227 (5)    | 120.4          |
|                        | C(3)-H(3A)···I(1) <sup>iv</sup>  | 0.96       | 3.35         | 4.067 (4)    | 132.8          |
|                        | C(3)-H(3B)···I(2) <sup>v</sup>   | 0.96       | 3.33         | 4.176 (4)    | 148.9          |
| <b>TBR-DITFB (2:1)</b> | N(1)-H(1)...O(6)#1               | 0.86       | 2.03         | 2.887(6)     | 175.7          |
|                        | C(7)-H(7A)...O(2)#2              | 0.96       | 2.31         | 3.245(8)     | 165.1          |
|                        | C(7)-H(7C)...O(6)#3              | 0.96       | 2.63         | 3.544(8)     | 158.8          |

D-H: donor; A: acceptor

Symmetry codes for cocrystal **CAF-DITFB**: #1 -x+1,-y+2,-z+1 #2 -x+1,y+1/2,-z+3/2 #3 -x,y+1/2,-z+1/2 #4 -x,y-1/2,-z+1/2

cocrystal **TPH-DITFB**: (i) -x+1, -y+1, -z+2; (ii) -x+1/2, y-1/2, -z+3/2; (iii) -x+1/2, y+1/2, -z+3/2; (iv) x, y+1, z; (v) -x+1, -y+1, -z+1.

cocrystal **TBR-DITFB (2:1)**: #1 -x+1,-y+1,-z+2 #2 x-1,y-1,z #3 -x+1,-y,-z+2

**Figure S2.** TGA-DSC of the cocystal **CAF-DITFB**.

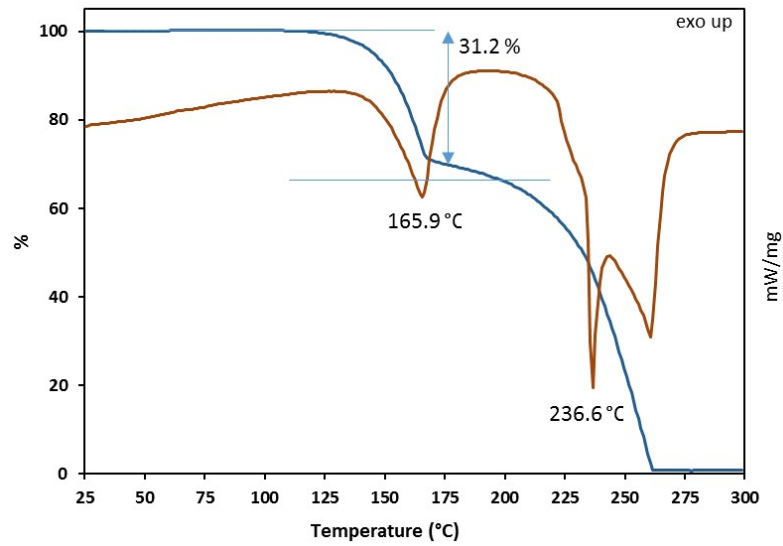

**Figure S3.** a) TGA-DSC trace of cocystal **TPH-DITFB** and b) phase transformation between theophylline and its cocystal.

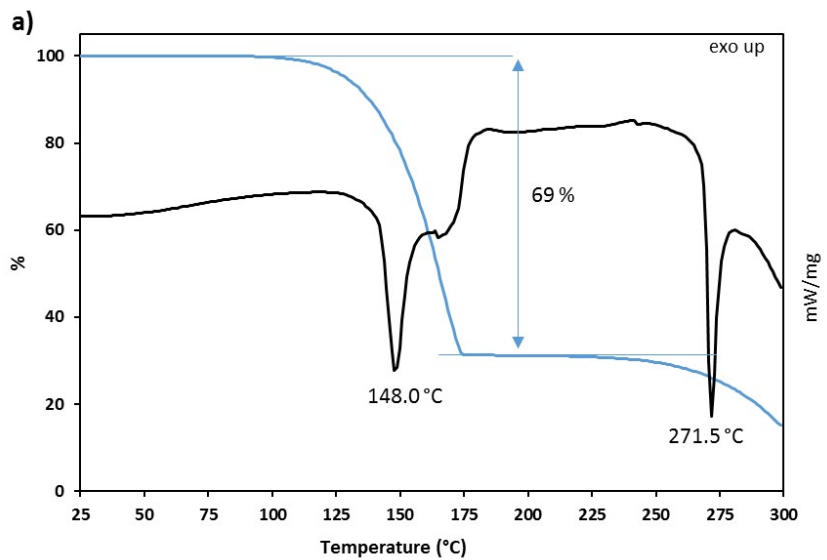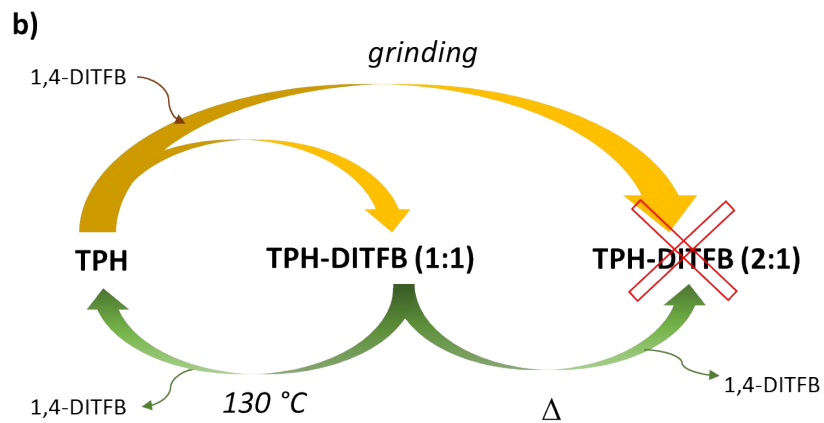

**Figure S4.** Transformation process by heating **CAF-DITFB** cocrystal (left) to **CAF** (right). Optical images under visible light (a and b) and under UV (365 nm) (c and d). Under UV the off-on transformation could be observed.

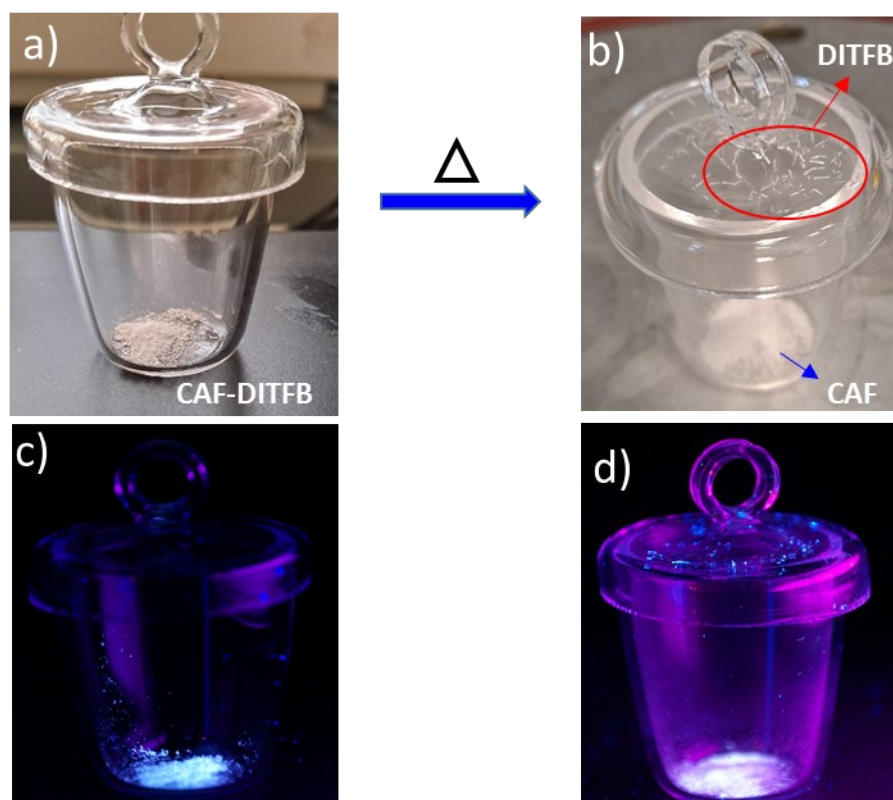

**Figures S5.** FTIR spectra of natural xanthines, coformer **DITFB** and their cocrystals.

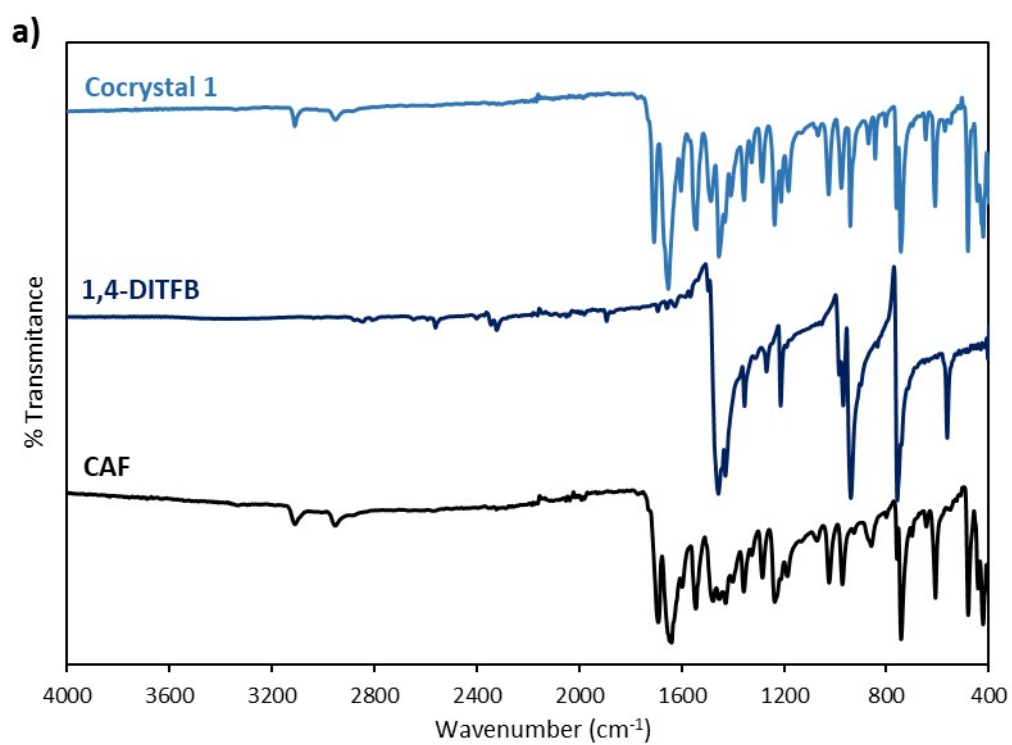

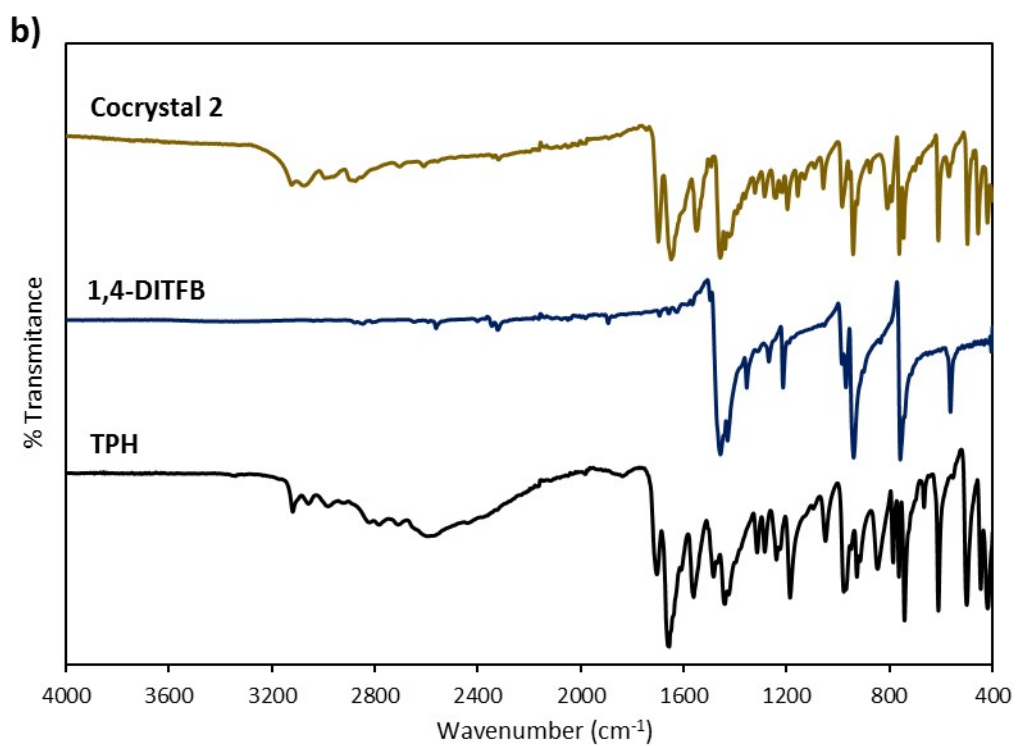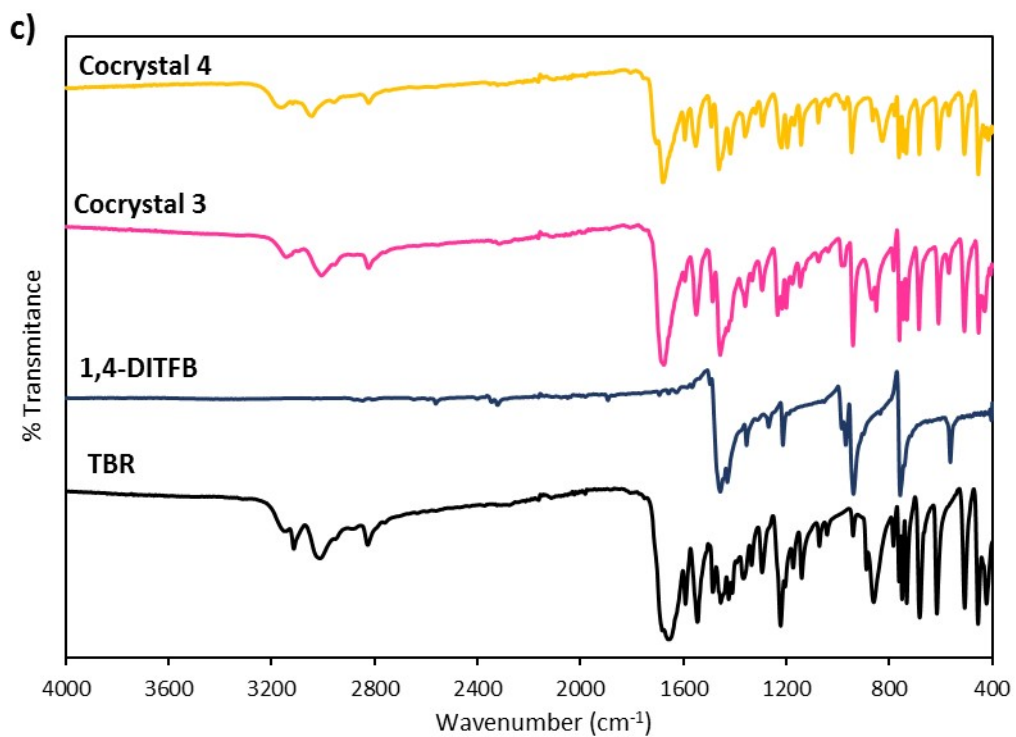

**Table S2.** Summary of characteristic vibrational modes of the studied xanthenes and cofomer **DITFB**.

| Vibrational mode       | DITFB | CAF        | CAF-DITFB     | TPH                    | TPH-DITFB              | TBR                             | TBR-DITFB (1:1)     | TBR-DITFB (2:1)                 |
|------------------------|-------|------------|---------------|------------------------|------------------------|---------------------------------|---------------------|---------------------------------|
| $\nu_{C-C}$ stretch    | 1456  | -          | 1453          | -                      | 1458                   | -                               | 1456                | 1461                            |
| $\nu_{C-F}$ stretch.   | 937   | -          | 940           | -                      | 943                    | -                               | 940                 | 943                             |
| $\nu_{C-I}$ asymm.     | 755   | -          | 743           | -                      | 761                    | -                               | 758                 | 761                             |
| $\nu_{C=O}; \nu_{C=N}$ | -     | 1691; 1640 | 1707;<br>1651 | 1704;<br>1657          | 1699;<br>1645          | 1657;<br>1592                   | 1675                | 1704;<br>1678                   |
| $\nu_{N-H}$            | -     | 3113; 2955 | 3113;<br>2950 | 3118;3<br>057;<br>2984 | 3123;<br>3075;<br>2998 | 3150;<br>3115;<br>3016;<br>2827 | 3139; 3005;<br>2824 | 3164;<br>3043;<br>2955;<br>2824 |

**Figure S6.** Absorption and fluorescent emission spectra of **TPH** and **TPH-DITFB** cocrystal (a and b).

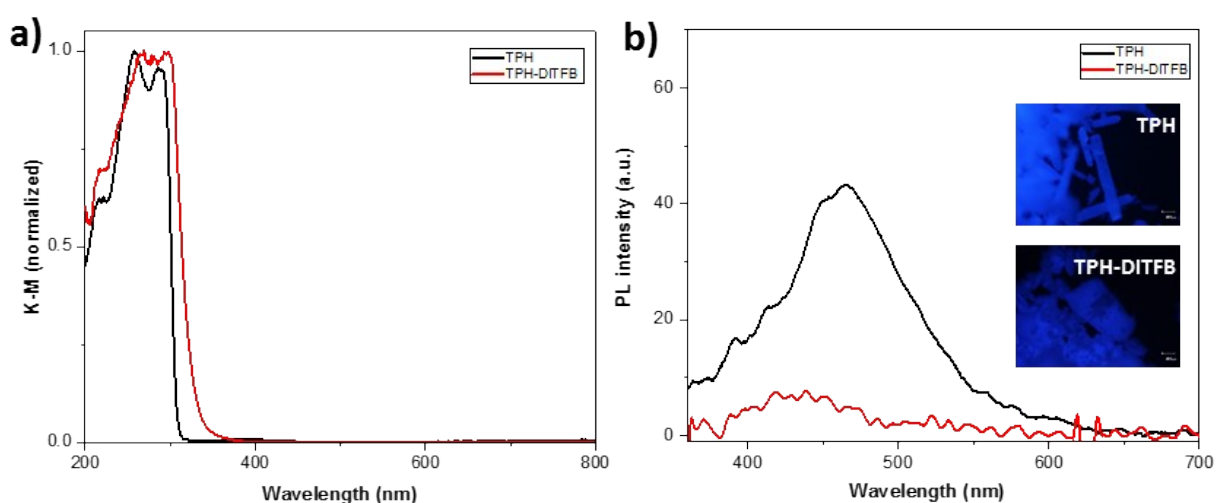



**Table S3.** Comparison of experimental and theoretical calculated cell parameters.

| Parameters   | CAF-DITFB  |            | TPH-DITFB  |            | TBR-DITFB (2:1) |           |
|--------------|------------|------------|------------|------------|-----------------|-----------|
|              | Cryst data | Theo data  | Cryst data | Theo data  | Cryst data      | Theo data |
| a (Å)        | 21.904(18) | 21.924385  | 19.924(8)  | 19.821105  | 4.0269(18)      | 4.102633  |
| b (Å)        | 4.044(4)   | 4.113429   | 4.4267(18) | 4.451576   | 7.451(3)        | 7.422291  |
| c (Å)        | 25.87(2)   | 25.756875  | 20.419(8)  | 20.357605  | 20.660(9)       | 20.589755 |
| $\alpha$ (°) | 90         | 90         | 90         | 90         | 82.022(8)       | 81.994578 |
| $\beta$ (°)  | 110.90(2)  | 110.996125 | 113.293(9) | 113.367412 | 80.671(9)       | 80.634592 |
| $\gamma$ (°) | 90         | 90         | 90         | 90         | 88.669(8)       | 88.664453 |

**Table S4.** X-bond interaction with distances and angles for the optimized cocrystals through periodic DFT calculations.

| Cocrystal                | I $\cdots$ N        | d(I $\cdots$ N) (Å) | (C-I $\cdots$ N) (°) |
|--------------------------|---------------------|---------------------|----------------------|
| CAF-DITFB *              | I(1) $\cdots$ N(29) | 2.859               | 175.41               |
| CAF-DITFB (Periodic-DFT) | I $\cdots$ N        | 2.803               | 174.40               |
| TPH-DITFB*               | I(1) $\cdots$ N(9)  | 2.983               | 177.19               |
| TPH-DITFB (Periodic-DFT) | I $\cdots$ N        | 2.90                | 176.73               |
| TBR-DITFB (2:1) *        | I(9) $\cdots$ N(9)  | 3.034               | 176.02               |
| TBR-DITFB (Periodic-DFT) | I $\cdots$ N        | 2.957               | 175.094              |

\*Labeling of N and I atoms refer to the labeling of these atoms in the main text.

**Table S5.** Surfaces of the molecular orbital (MOs) with their energies (eV), PBE0/ def2-TZPP theoretical level.

| System           | $\lambda(\text{nm})$ | $f$  | Assignment                                           | Active Molecular Orbital                                                            |                                                                                       |
|------------------|----------------------|------|------------------------------------------------------|-------------------------------------------------------------------------------------|---------------------------------------------------------------------------------------|
| <b>CAF-DITFB</b> | 257                  | 0.32 | $\pi^{(\text{CAF})} \rightarrow \pi^{*(\text{CAF})}$ | 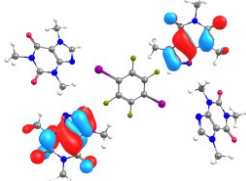   |    |
|                  |                      |      |                                                      | H-1                                                                                 | L+6                                                                                   |
|                  | 256                  | 0.43 | $\pi^{(\text{CAF})} \rightarrow \pi^{*(\text{CAF})}$ |    |    |
|                  |                      |      |                                                      | H                                                                                   | L+7                                                                                   |
|                  | 256                  | 0.43 | $\pi^{(\text{CAF})} \rightarrow \pi^{*(\text{CAF})}$ |    |    |
|                  |                      |      |                                                      | H-3                                                                                 | L+4                                                                                   |
|                  | 256                  | 0.43 | $\pi^{(\text{CAF})} \rightarrow \pi^{*(\text{CAF})}$ |   |   |
|                  |                      |      |                                                      | H-2                                                                                 | L+5                                                                                   |
| <b>CAF</b>       | 259                  | 0.52 | $\pi^{(\text{CAF})} \rightarrow \pi^{*(\text{CAF})}$ |  |  |
|                  |                      |      |                                                      | H-1                                                                                 | L                                                                                     |
| <b>TPH-DITFB</b> | 249                  | 0.29 | $\pi^{(\text{TPH})} \rightarrow \pi^{*(\text{TPH})}$ |  |  |
|                  |                      |      |                                                      | H                                                                                   | L+1                                                                                   |
| <b>TPH</b>       | 255                  | 0.23 | $\pi^{(\text{TPH})} \rightarrow \pi^{*(\text{TPH})}$ |  |  |
|                  |                      |      |                                                      | H                                                                                   | L+1                                                                                   |
|                  | 251                  | 0.18 | $\pi^{(\text{TPH})} \rightarrow \pi^{*(\text{TPH})}$ |  |  |
|                  |                      |      |                                                      | H-1                                                                                 | L                                                                                     |
| <b>TBR-DITFB</b> | 255                  | 0.67 | $\pi^{(\text{TBR})} \rightarrow \pi^{*(\text{TBR})}$ |  |  |
|                  |                      |      |                                                      | H-1                                                                                 | L                                                                                     |

|            |      |                                                      |                                                      |     |     |
|------------|------|------------------------------------------------------|------------------------------------------------------|-----|-----|
|            |      |                                                      | $\pi^{(\text{TBR})} \rightarrow \pi^{*(\text{TBR})}$ | H-1 | L   |
|            |      |                                                      |                                                      |     |     |
| 239        | 0.23 | $\pi^{(\text{TBR})} \rightarrow \pi^{*(\text{TBR})}$ | H                                                    | L+1 |     |
|            |      |                                                      |                                                      |     |     |
| <b>TBR</b> | 251  | 0.14                                                 | $\pi^{(\text{TBR})} \rightarrow \pi^{*(\text{TBR})}$ | H-1 | L+1 |
|            |      |                                                      |                                                      |     |     |
|            | 247  | 0.28                                                 | $\pi^{(\text{TBR})} \rightarrow \pi^{*(\text{TBR})}$ | H-2 | L   |
|            |      |                                                      |                                                      |     |     |
|            |      |                                                      | H                                                    | L+2 |     |
|            |      |                                                      |                                                      |     |     |

**Figure S7.** Energy diagrams for the most probable emission pathways in free xanthenes. ISC, intersystem crossing.

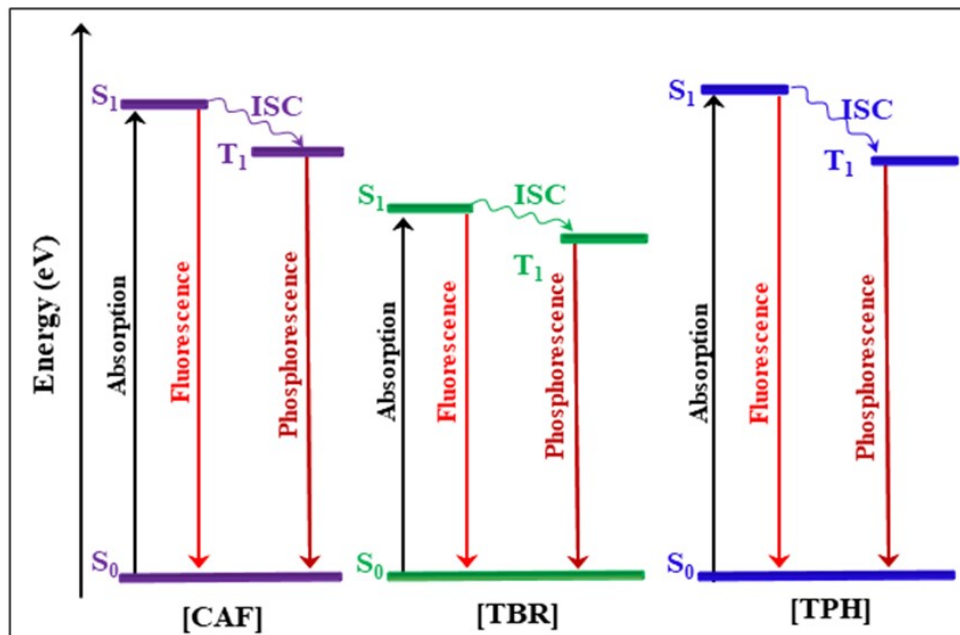

**Figure S8.** Frontier molecular orbitals of **CAF** based on the configurations of first electronic excited state. a. FMO of **CAF** in the  $S_1$  electronic state. b. FMO of **CAF** in the  $T_1$  electronic state. MO involved in these emissive states of the  $T_1$  electronic state are dotted by green lines.

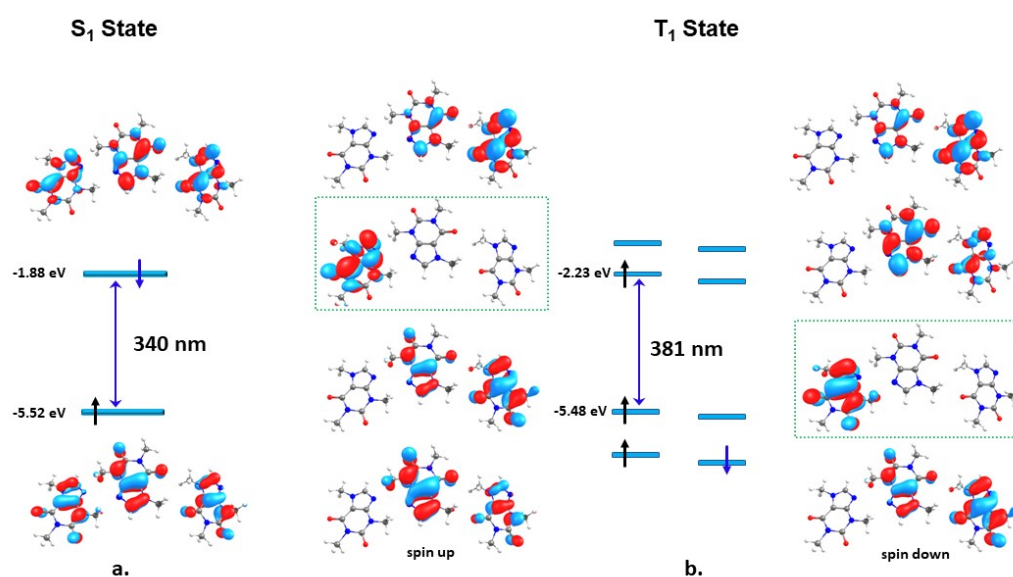

**Figure S9.** Frontier molecular orbitals of theobromine (**TBR**) based on the configurations of first electronic excited state. a. FMO of **TBR** in the  $S_1$  electronic state. b. FMO of **TBR** in the  $T_1$  electronic state. MO involved in these emissive states of the  $T_1$  electronic state are dotted by green lines.

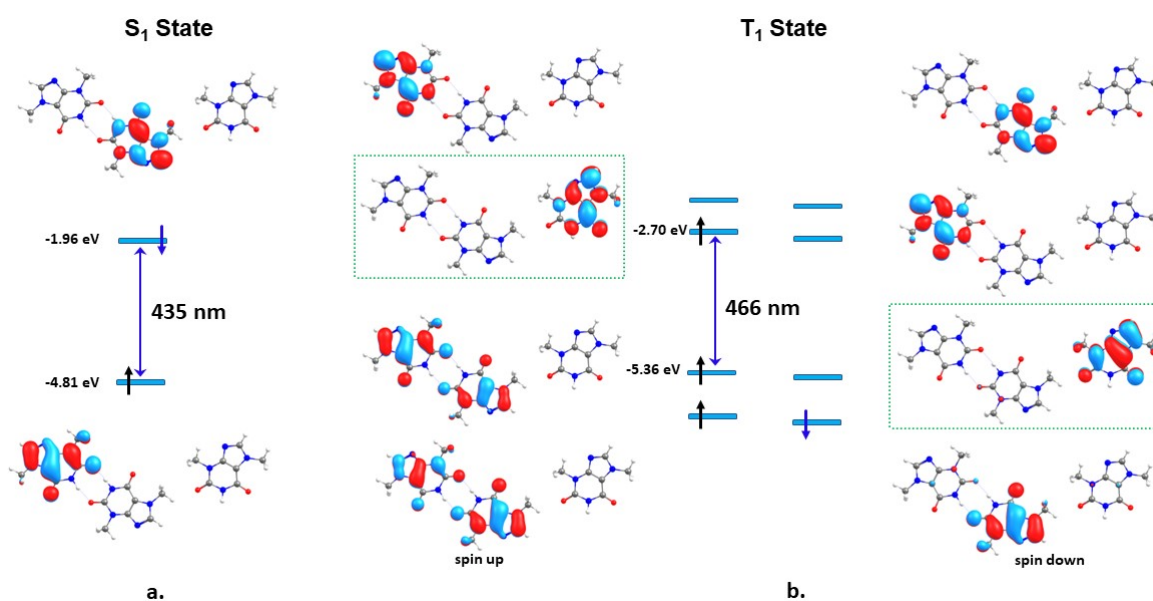

**Figure S10.** Frontier molecular orbitals of theophylline (TPH) based on the configurations of first electronic excited state. a. FMO of TPH in the  $S_1$  electronic state. b. FMO of TPH in the  $T_1$  electronic state. MO involved in these emissive states of the  $T_1$  electronic state are dotted by green lines.

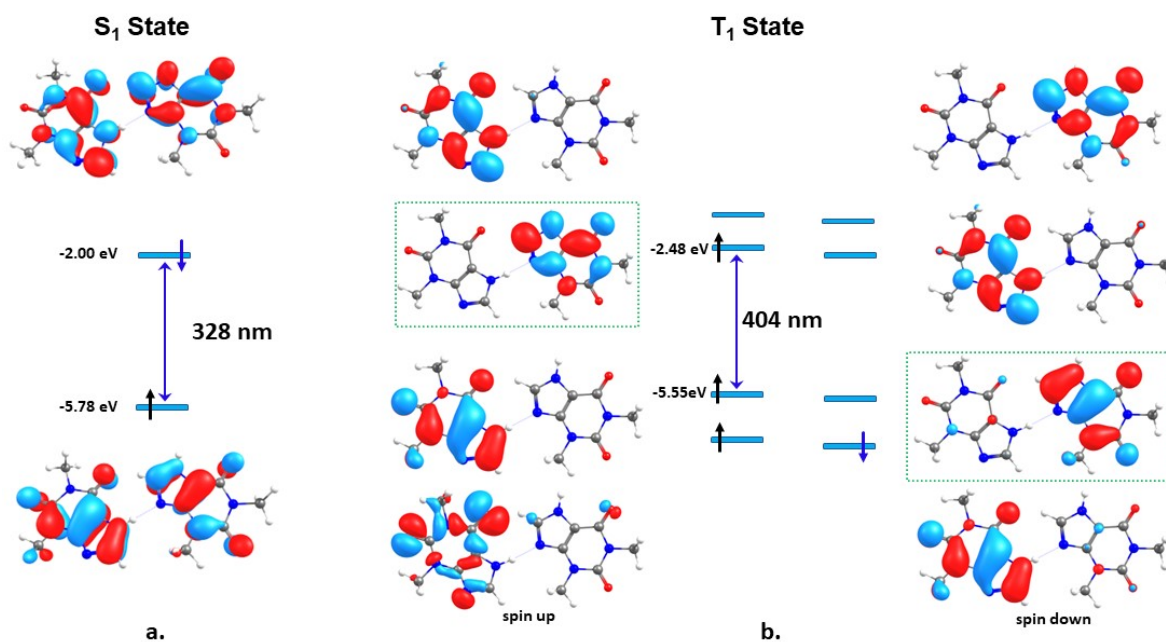

**Figure S11.** Frontier molecular orbitals of cocrystals based on the configurations of ground electronic excited state. a. FMO of CAF-DITFB in the  $S_0$  electronic state. b. FMO of TPH-DITFB in the  $S_0$  electronic state. c. FMO of TBR-DITFB in the  $S_0$  electronic state.

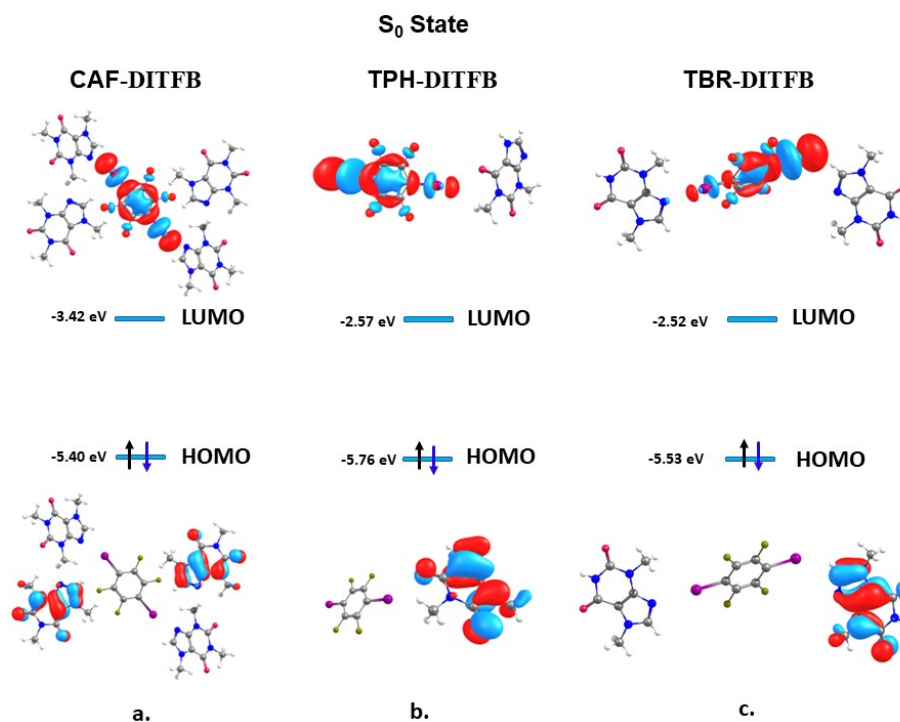

**Figure S12.** Energy diagrams for the most probable emission pathways in cocrystals. ISC, intersystem crossing.

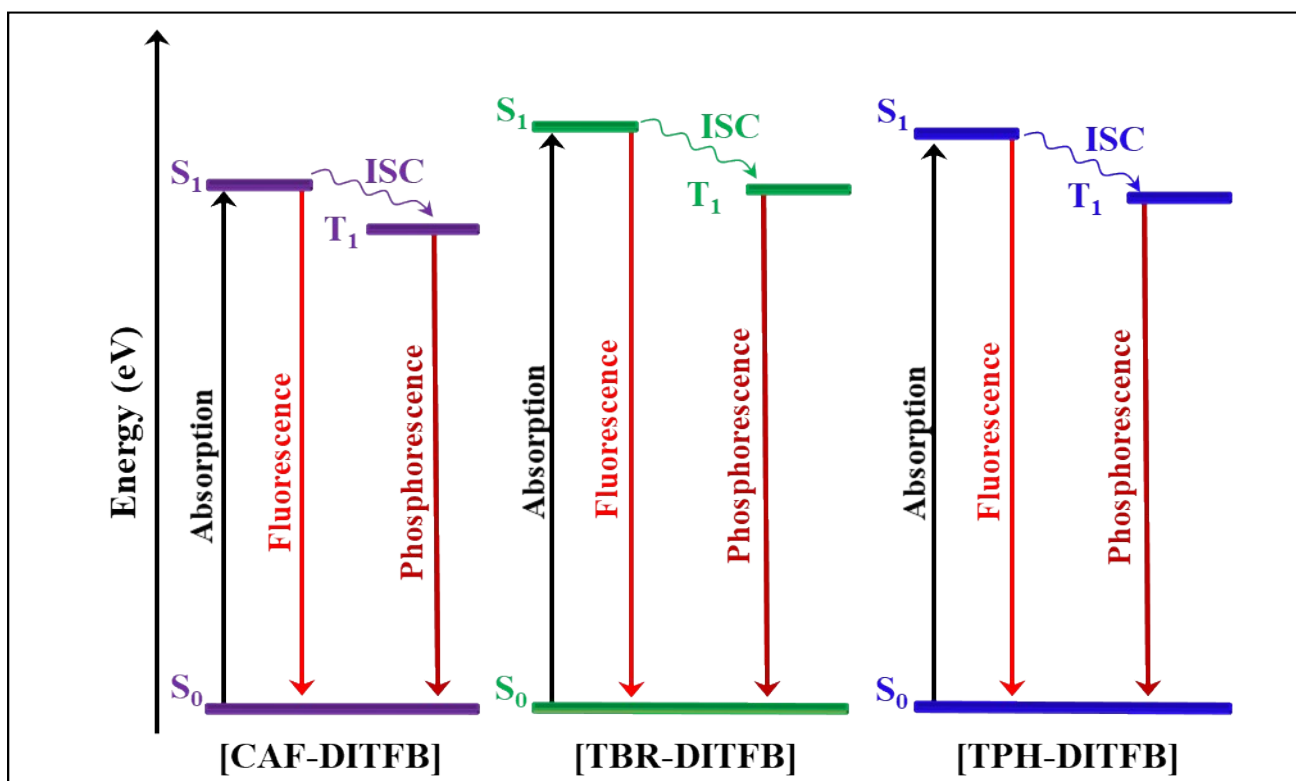

**Figure S13.** Frontier molecular orbitals of cocrystals **CAF-DITFB** based on the configurations of first electronic excited state. a. FMO of **CAF-DITFB** in the  $S_1$  electronic state. b. FMO of **CAF-DITFB** in the  $T_1$  electronic state. MO involved in these emissive states of the  $T_1$  electronic state are dotted by green lines.

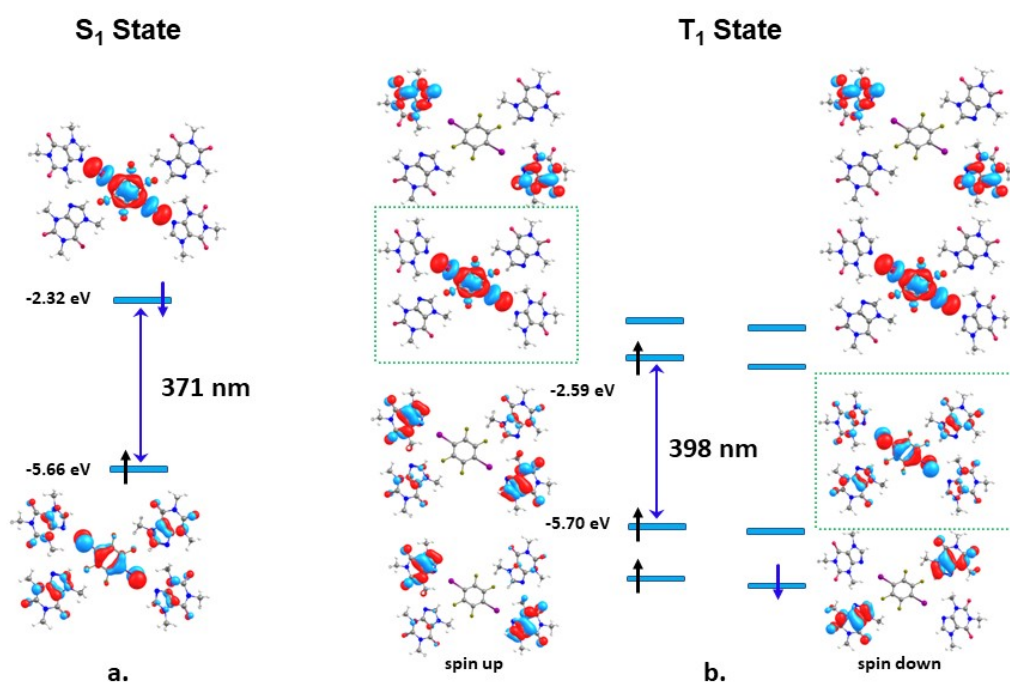

**Figure S14.** Frontier molecular orbitals of cocrystals **TPH-DITFB** based on the configurations of first electronic excited state. a. FMO of **TPH-DITFB** in the  $S_1$  electronic state. b. FMO of **TPH-DITFB** in the  $T_1$  electronic state. MO involved in these emissive states of the  $T_1$  electronic state are dotted by green lines.

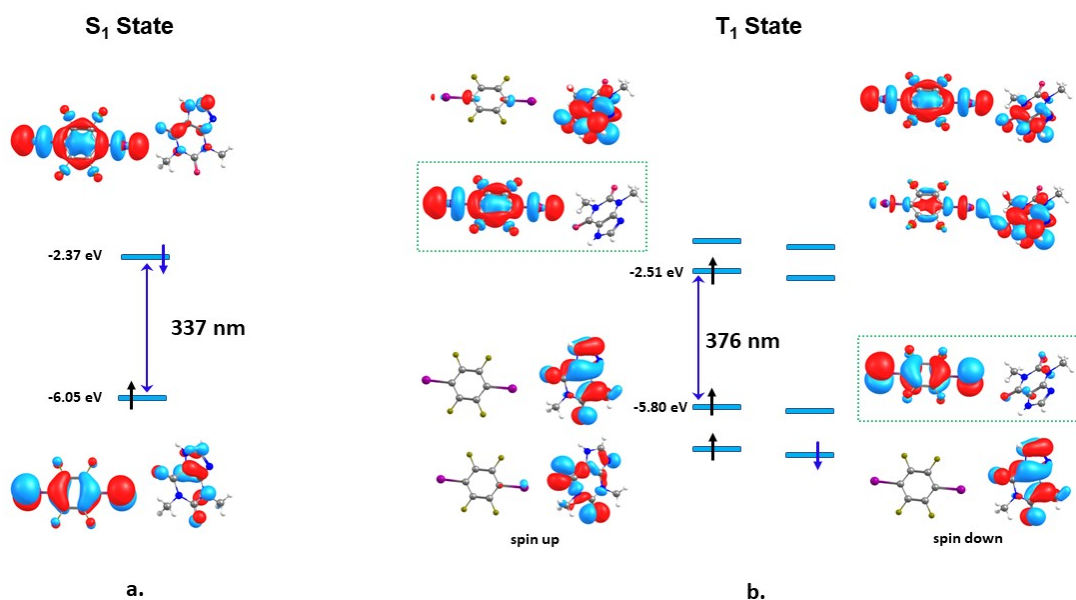

**Figure S15.** Frontier molecular orbitals of cocrystals **TBR-DITFB** based on the configurations of first electronic excited state. a. FMO of **TBR-DITFB** in the  $S_1$  electronic state. b. FMO of **TBR-DITFB** in the  $T_1$  electronic state. MO involved in these emissive states of the  $T_1$  electronic state are dotted by green lines.

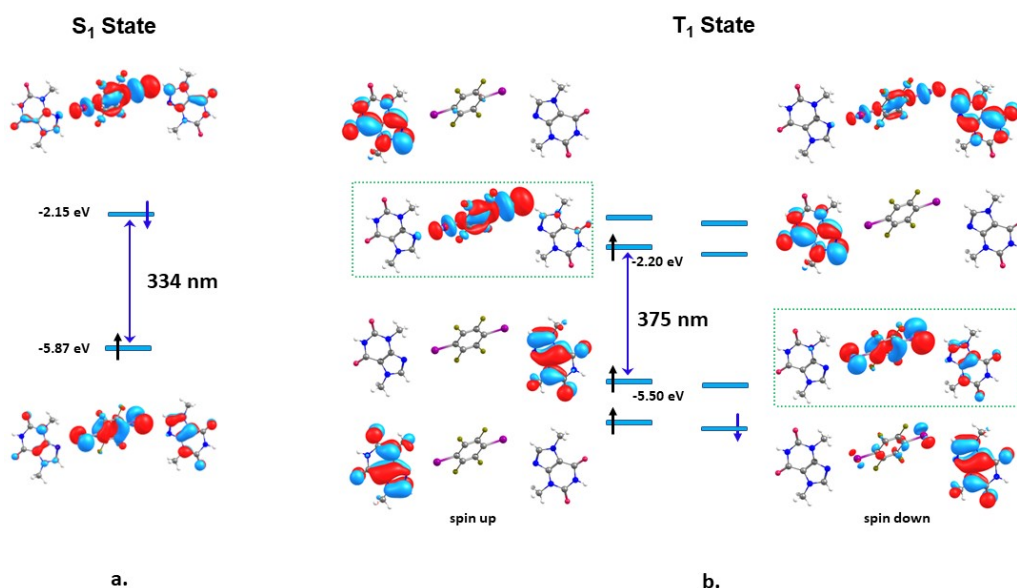

Supplement: d4ce00138a1.pdf [file d4ce00138a1.pdf]
